# Supplementary material
Source: PubMed Central journal article supplement (PMC6832062)
Supplement: JB.00366-19-s0001.pdf [file JB.00366-19-s0001.pdf]

## Supplemental Material

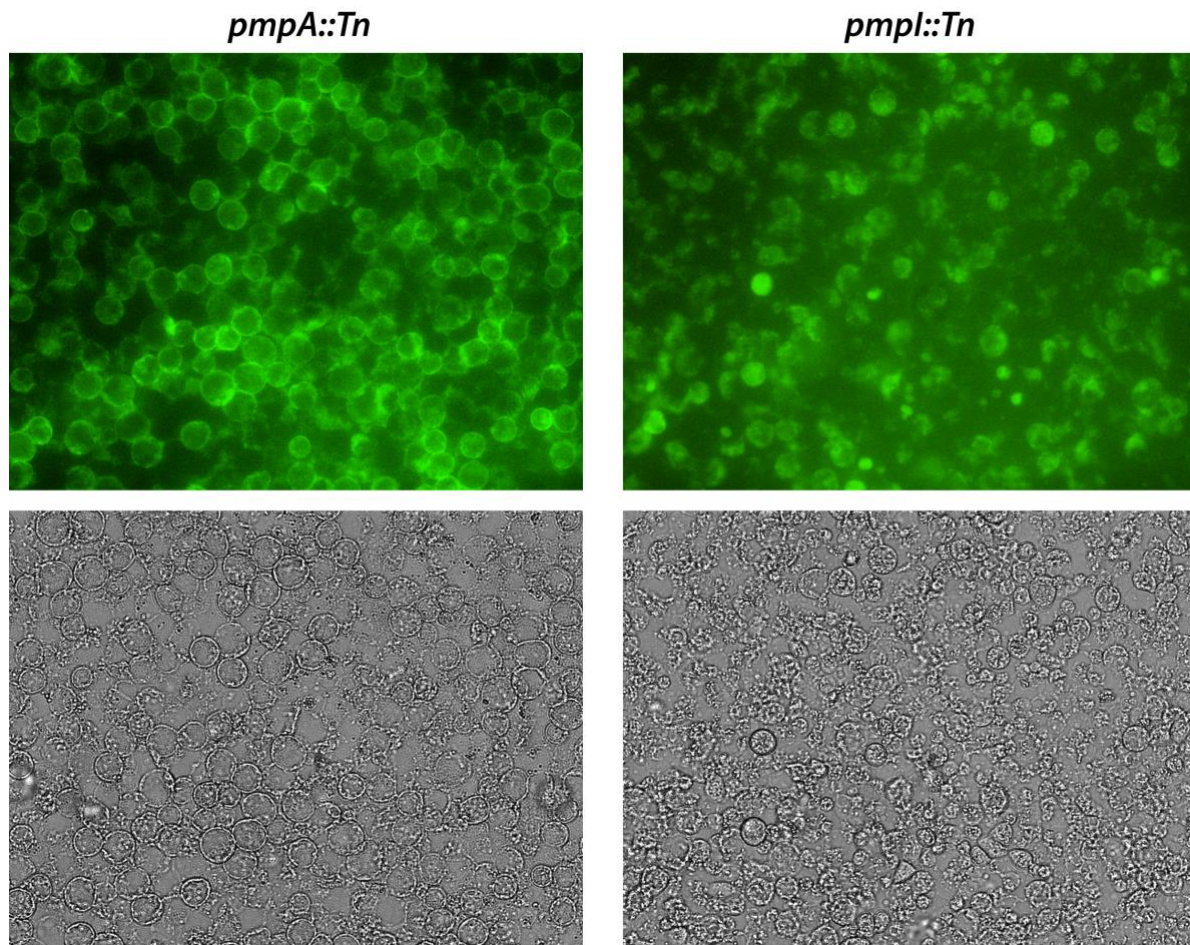

**Fig S1 Accumulation of extrusions in *pmpA::Tn* infected monolayers.** McCoy cells were infected with *pmpA::Tn* or *pmpl::Tn* and imaged at 46 hpi. Images were acquired by live fluorescence microscopy at 20× magnification, taken at focus planes above the monolayer of adherent cells. Upper panels: GFP-expressing *C. muridarum* mutants (green). Lower panels: brightfield images. We draw the reader's eye to the large number of circular, ring-like objects in the *pmpA::Tn* sample, which are strongly reminiscent of cell-free *Chlamydia* extrusions. These structures are largely absent in *pmpl::Tn* infected monolayers, and cells infected with WT *C. muridarum* (not shown).

### WT *C. muridarum*

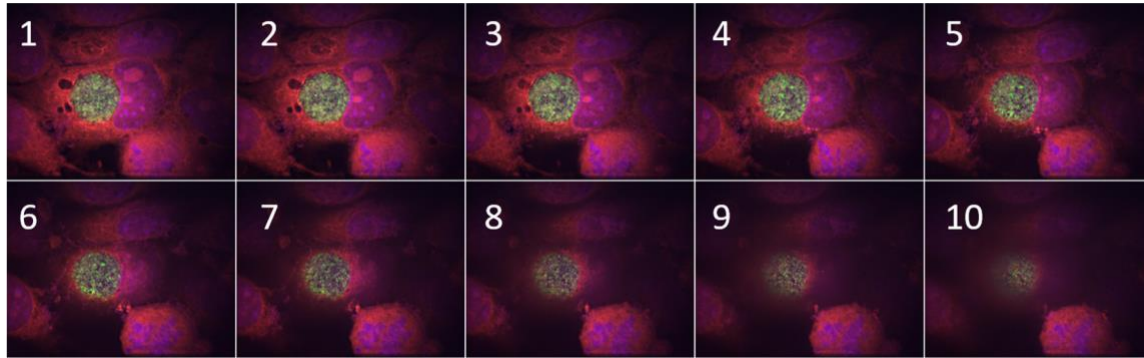

### *pmpl::Tn*

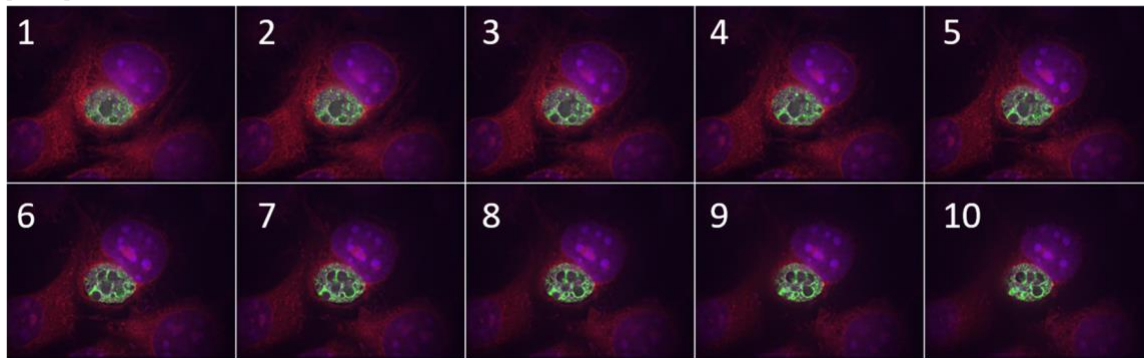

**Fig S2 Confocal z-stack of WT and *pmpl::Tn* mutant.** L929 cells were infected in 8-well microSlide dishes at an MOI of ~0.1 with WT *C. muridarum* or *pmpl::Tn*. Cells were fixed at 24 hours post infection, and stained with anti-LPS-GFP conjugated antibody (green), evans blue counterstain (red), and DAPI (blue). Images were taken using a 150X objective on an Olympus IX81/31 spinning disk confocal inverted microscope, and captured using an Andor Zyla 4.2 sCMOS camera. Images represent 10 z-stacks at 0.3  $\mu\text{m}$  intervals of representative inclusions.

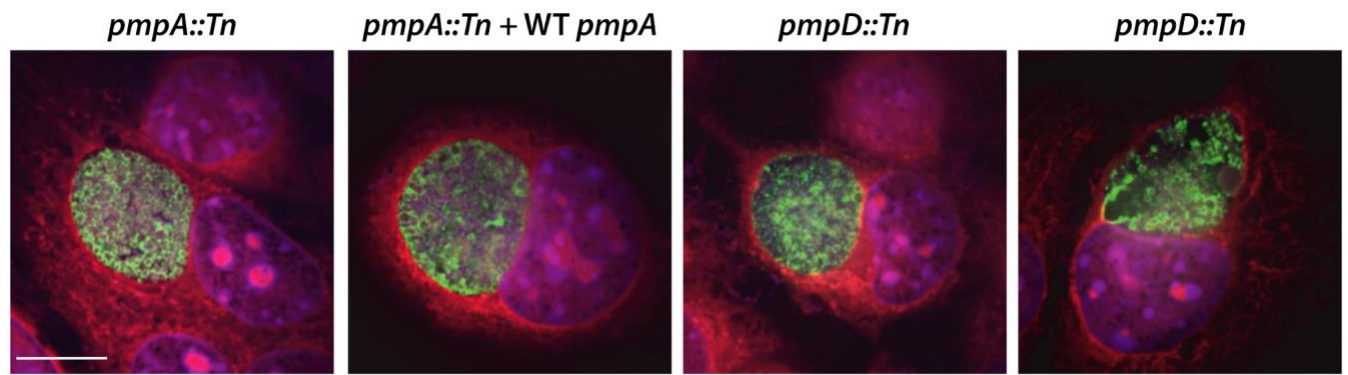

**Fig S3. Morphologies of inclusions containing *pmpA::Tn*, *pmpA::Tn* complemented, and *pmpD::Tn* strains.** McCoy cells were infected with indicated strains and analyzed by confocal immunofluorescence microscopy at 24 hpi. Anti-LPS, green; DAPI, blue, evans blue, red. Scale bar = 10  $\mu$ m.

**Table S1** *C. muridarum* WT compared to *C. muridarum* Str Nigg (NC\_002620.2)

| Location (NCBI) | Gene     | Change <sup>a</sup> | NC_002620 | WT Cm  | Search target (Base Change)     |
|-----------------|----------|---------------------|-----------|--------|---------------------------------|
| 10505           | TC0007   | /                   | K         | A      | TCTAATGTAAAACGGCAAA (K→A)       |
| 10558           | TC0007   | /                   | W         | A      | AAGTGGCTAGGCTATTACGA (W→A)      |
| 10564           | TC0007   | /                   | Y         | A      | CTAGGCTATTACGAWTTTTA (Y→A)      |
| 32915           | TC0027   | /                   | M         | G      | ATCTGGTTTTTGACGGACCA (M→G)      |
| 58882           | TC0052   | /                   | M         | T      | TTGGGTTCCAAGTGGTCATT (M→T)      |
| 58904           | TC0052   | /                   | M         | T      | TAAGATAGAGGTCTCAAGCT (M→T)      |
| 59062           | TC0052   | DEL                 | GTT       | -      | TAGTATCTGTAGCGCTAACT (GTT→ -/-) |
| 126383          | IGR      | /                   | Y         | G      | ACTCGACCAGCTTCATCCTA (Y→G)      |
| 126408          | IGR      | DEL                 | G         | -      | ATTTTTCGTTAGGGGCAAGG (G→ -)     |
| 126418          | IGR      | INS                 | -         | A      | AGGGGCAAGGGTCCTTGCAA (- →A)     |
| 126436          | IGR      | /                   | W         | A      | AAGATCTTTTCATTCTAAGT (W→A)      |
| 126479          | IGR      | DEL                 | A         | -      | TATTTAATCTATGGCTAAAA (A→ -)     |
| 136842          | 23S      | /                   | A         | R(A/G) | GGGCTAAGCATAAAAACCGAC (A→R)     |
| 141412          | 23S rlmD | INS                 | -         | A      | GTGCTCATGGCGTCTACAAA (- →A)     |
| 158800          | 23S      | /                   | Y         | R(A/G) | GGGCTAAGCATAAAAACCGAC (Y→R)     |
| 169452          | TC0138   | INS                 | T(3)      | T(6)   | ACTGGTGAAACCTCTTATTT (- →TTT)   |
| 187432          | TC0255   | H→Y                 | G         | A      | AGGAGCATGGTCTCTGTAAT (G→A)      |
| 200671          | TC0168   | T→R                 | G         | C      | CTCTAAATCCCACAGAATTT (G→C)      |
| 358414          | TC0301   | E→D                 | R         | T      | TTGCGTTCTCAAGATCCGGA (R→T)      |
| 401302          | TC0338   | /                   | Y         | G      | ATATGGGTGTATGGATTTTCG (Y→G)     |
| 403623          | TC0341   | L→Y                 | TA        | AC     | CTTTGTTTCGTTCTAGAAAAGT (TA→AC)  |
| 403652          | TC0341   | S→P                 | T         | C      | ATTTTGGGTCCAAAGCATTT (T→C)      |
| 403714          | TC0341   | /                   | M         | G      | TCTTGTTTCGATCATCAATG (M→G)      |
| 404473          | TC0342   | /                   | M         | T      | AGTATTTTTGGTTTTATTGA (M→T)      |
| 404885          | TC0342   | DEL                 | A         | -      | AGAAGGCATATTTTACTTCA (A→ -)     |
| 405819          | TC0343   | /                   | Y         | G      | GAATTTCTCCCTATTGATGA (Y→G)      |
| 419119          | TC0359   | /                   | R         | C      | TTCTAGAACTAAACAGCCTC (R→C)      |
| 468932          | TC0408   | P→Q                 | G         | T      | TACTTGAGGTTATTGCTGGT (G→T)      |
| 473705          | TC0412   | DEL                 | G         | -      | AAAGTATTATGGCCATTCAA (G→ -)     |
| 5000055         | IGR      | DEL                 | G(12)     | G(11)  | GTTGAAAGAGGTCTCTTTCCT (G12→G11) |
| 505388          | TC0436   | INS                 | C(12)     | C(13)  | AAATAGTGATGAATAAACTG (C12→C13)  |
| 515204          | TC0437   | /                   | S         | G      | TGACCGCATCCTATTATCTA (S→G)      |
| 545710          | TC0447   | INS                 | G(13)     | G(14)  | TTACAAAGAGCGTTTCCTCT (G13→G14)  |
| 600435          | TC0493   | Silent              | C         | A      | CGACCTCTTATTCTTGTTCC (C→A)      |
| 712587          | TC0596   | /                   | R         | C      | GAATGGTTTATGACGACCAC (R→C)      |
| 846475          | IGR      | DEL                 | G         | -      | TTGTCTTTGAAGATCCTTTG (G→ -)     |
| 866102          | TC0727   | Silent              | G         | T      | TCAGCTAAGCTAATAACGTT (G→T)      |
| 1004257         | TC0867   | S→P                 | T         | C      | TCGGAGCTCTTACAGCCCAA (T→C)      |
| 1022529         | TC0879   | Silent              | G         | A      | AGAAGATAGTAAATCTTCTA (G→A)      |
| 1022551         | TC0879   | /                   | N         | A      | TCACGAACAACAAGAGTGG (N→A)       |
| 1035913         | TC0893   | /                   | N         | A      | TTTTACAGAGGAAGTCATGT (N→A)      |

<sup>a</sup> DEL denotes a deletion of 1 or more bases. INS denotes an insertion of 1 or more bases. / denotes ambiguous to confirmed base.

**TABLE S2** Primers used for confirming transposon insertions

| Primer name | Sequence                    | Primer location     | Amplicon (without Tn) | Insertion confirmed           |
|-------------|-----------------------------|---------------------|-----------------------|-------------------------------|
| UWCM_001_F  | AAGTGACTTAACGCAAATTCATAG    | 242,604-242,627     | 503 bp                | <i>TC0206::Tn</i>             |
| UWCM_001_R  | TCTTTTCGAATTGCTGACGAG       | 243,106-243,087     |                       |                               |
| UWCM_007a_F | GTTACGTTTGCTATTGGGGTATC     | 301,330-301,352     | 517 bp                | <i>glgB::Tn</i>               |
| UWCM_007a_R | GCTACCATCATCATCCAGAG        | 301,846-301,827     |                       |                               |
| UWCM_007b_F | CATCAGCAACTAAAGAGACTCTG     | 498,197-498,219     | 483 bp                | <i>macP::Tn</i>               |
| UWCM_007b_R | AGATAATCTTTTCATTATGAGCTGTC  | 498,679-498,654     |                       |                               |
| UWCM_009_F  | GTTAATCCTCCTGCAGACATAC      | 220,531-220,552     | 314 bp                | <i>TC0189::Tn</i>             |
| UWCM_009_R  | TTGGGCTTTATTCTTGTTTTCTAC    | 220,844-220,821     |                       |                               |
| UWCM_010_F  | TGTTACTTTTGAGAATGCCGAAG     | 362,995-363,016     | 271 bp                | <i>TC0305::Tn</i>             |
| UWCM_010_R  | GCTCGACGACATTGCTTAAC        | 363,265-363,246     |                       |                               |
| UWCM_011_F  | TCCGGCTTTAAATCCCAGATG       | 686,974-686,993     | 348 bp                | <i>pknD::Tn</i>               |
| UWCM_011_R  | CTCTCGTAGGGTAGCTCTAAAG      | 687,321-687,300     |                       |                               |
| UWCM_012_F  | AGGAATTGGAGCAGAAATGC        | 827,236-827,255     | 263 bp                | <i>pmpA::Tn</i>               |
| UWCM_012_R  | CATTATGATCTAAGGCTGCAC       | 827,498-827,478     |                       |                               |
| UWCM_013_F  | GTGTA AACCATCAACATCCTTATTAG | 413,525-413,550     | 304 bp                | <i>folD::Tn</i>               |
| UWCM_013_R  | CAAAGACAATATCCGATCCCAATC    | 413,828-413,805     |                       |                               |
| UWCM_014a_F | CTACTGAAGGACATGCGATTG       | 232,665-232,685     | 443 bp                | <i>pmpD::Tn</i>               |
| UWCM_014a_R | CTGAGCTTTAGAAGAAAATGATGC    | 233,107-233,084     |                       |                               |
| UWCM_014b_F | CGAGCTATTTTACATGCTGTTG      | 395,529-395,550     | 366 bp                | <i>gnd::Tn</i>                |
| UWCM_014b_R | AGGGTAAAAAACGAATGAAAGAG     | 395,894-395,872     |                       |                               |
| UWCM_019_F  | CGAATAATTGTCCAGCAGCTAAG     | 319,401-319,423     | 291 bp                | <i>pmpI::Tn</i>               |
| UWCM_019_R  | CTAATAGCTACATACCACACCCC     | 319,691-319,669     |                       |                               |
| UWCM_021_F  | GTTTCAATTTCTCTCTAAATCTCTG   | 26,513-26,537       | 280 bp                | <i>IGR::Tn</i>                |
| UWCM_021_R  | CATCATATTGCTCTGGAGTAGTC     | 26,792-26,770       |                       |                               |
| UWCM_022_F  | CTAATAACGCTGTAGATAGGTGG     | 361,333-361,355     | 2506 bp               | <i>TC0303::Tn<sup>a</sup></i> |
| UWCM_022R_R | CTATGCTCACCAACTACCTCC       | 363,838-363,818     |                       |                               |
| UWCM_023a_F | AGTTGAGTTCGATATTACTGTTCC    | 524,538-524,561     | 407 bp                | <i>TC0438::Tn</i>             |
| UWCM_023a_R | GCGTGGTAGATTTAGCTTCTTTC     | 524,944-524,922     |                       |                               |
| UWCM_023b_F | CAATTCCTTAACACAGAAGC        | 1,001,452-1,001,472 | 361 bp                | <i>IGR::Tn</i>                |
| UWCM_023b_R | TTCTACTAACAATATTAATGTGATTGG | 1,001,812-1,001,785 |                       |                               |
| UWCM_024_F  | GAGGAGAGTTCGATAAAGTGTG      | 429,694-429,715     | 304 bp                | <i>ribF::Tn, truB::Tn</i>     |
| UWCM_024_R  | GTGGAGCTTATTTGGAAGAGC       | 429,997-429,977     |                       |                               |
| UWCM_025_F  | GTTTTGCCAGCTCTTTGAC         | 725,811-725,830     | 356 bp                | <i>TC0606::Tn</i>             |
| UWCM_025_R  | GATTATGATTGCTCCGTTGATC      | 726,166-726,144     |                       |                               |
| UWCM_026_F  | CACGTTAGATTGCTCCTGCATAATC   | 251,137-251,160     | 303 bp                | <i>rnuC::Tn</i>               |
| UWCM_026_R  | GTAGATGCTAATGATTCCTTCTCTC   | 251,439-251,415     |                       |                               |

<sup>a</sup> Insert occurred with a 2073 bp deletion beginning at 361,528
